# Supplementary material for: Free-standing reduced graphene oxide/MnO2–reduced graphene oxide–carbon nanotube nanocomposite flexible membrane as an anode for improving lithium-ion batteries
Source: Royal Society of Chemistry journal article supplement (doi:10.1039/c6cp07784f), 2016-12-19
Supplement: c6cp07784f1.pdf [file c6cp07784f1.pdf]

## Supporting Information

### Free-standing Reduced Graphene Oxide/ MnO<sub>2</sub>-Reduced Graphene Oxide- Carbon nanotube nanocomposite flexible membrane as Anode for High Capacity Lithium Ion Batteries

Yong Li<sup>‡</sup>, Dai Xin Ye<sup>§\*</sup>, Bin Shi<sup>‡</sup>, Wen Liu<sup>‡</sup>, Rui Guo<sup>‡</sup>, Hai Juan Pei<sup>‡</sup>, Jing Ying Xie<sup>‡\*</sup>

<sup>‡</sup>State Key Laboratory of Space Power Technology, Shanghai Institute of Space Power

Sources, shanghai, 200245, China

<sup>§</sup> Department of Chemistry and Molecular Biology, University of Gothenburg, S-41296, Gothenburg, Sweden

\* Address correspondence to [daixin@chalmers.se](mailto:daixin@chalmers.se) or [jyxie@mail.sim.ac.cn](mailto:jyxie@mail.sim.ac.cn)

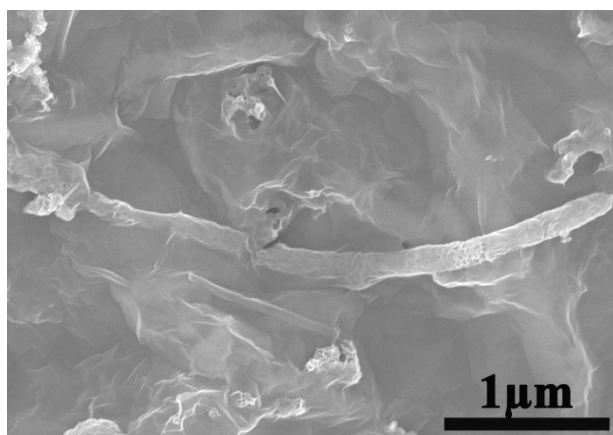

Figure S1 top-view SEM images of G-MGC composite membrane.

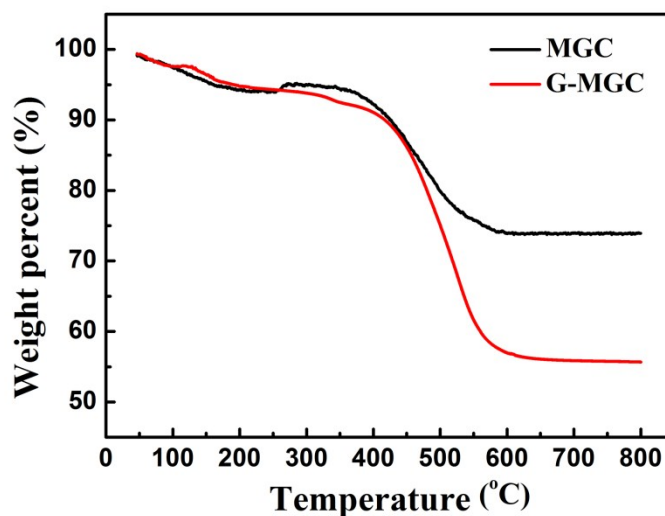

**Figure S2** TG curves for MGC and G-MGC from room to 800 °C at a heating rate of 10 °C min<sup>-1</sup> under air.

**Table S1** Comparison of MnO<sub>2</sub> contents of G-MGC freestanding flexible membrane-electrode with previous works.

| Types                                                               | MnO <sub>2</sub> content in composite | MnO <sub>2</sub> content in electrode (not including current collector) | MnO <sub>2</sub> content in electrode (including current collector) |
|---------------------------------------------------------------------|---------------------------------------|-------------------------------------------------------------------------|---------------------------------------------------------------------|
| PPy/MWNTs/MnO <sub>2</sub> composite <sup>[1]</sup>                 | 48 wt%                                | 38.4 wt%                                                                | 7.68 wt%                                                            |
| Pure MnO <sub>2</sub> nanorods <sup>[2]</sup>                       | 100 wt%                               | 40 wt%                                                                  | 20 wt%                                                              |
| MnO <sub>2</sub> /carbon composite <sup>[3]</sup>                   | 42 wt%                                | 33.6 wt%                                                                | 16.8 wt%                                                            |
| MnO <sub>2</sub> /N-doped carbon composite <sup>[4]</sup>           | 81.4 wt%                              | 61.05 wt%                                                               | 30.5 wt%                                                            |
| Polythiophene/ MnO <sub>2</sub> composite <sup>[5]</sup>            | 86 wt%                                | 68.8 wt%                                                                | 34.4 wt%                                                            |
| manganese oxide/carbon yolk-shell nanorods composite <sup>[6]</sup> | 70.07 wt%                             | 49.63 wt%                                                               | 24.8 wt%                                                            |
| MnO/graphene composite <sup>[7]</sup>                               | 82.6 wt%                              | 66.08 wt%                                                               | 33.0 wt%                                                            |
| G-MGC freestanding membrane                                         |                                       | 56 wt%                                                                  | 56 wt%                                                              |

**Note:** MnO<sub>2</sub> contents in electrode (including current collector) were calculated based on the areal density of copper foil (7.5 mg cm<sup>-2</sup>, almost the least value in the Li-ion battery market) and electrode of the reported paper (if not mentioned, supposed the value is 7.5 mg cm<sup>-2</sup>).

## References

- [1] J. X. Li, M. Z. Zou, Y. Zhao, Y. B. Lin, H. Lai, L. H. Guan, Z. G. Huang, *Electrochim. Acta.* **2013**, *111*, 165.

- [2] J. B. Chen, Y. W. Wang, X. M. He, S. M. Xu, M. Fang, X. Zhao, Y. M. Shang, *Electrochim. Acta.* **2014**, *142*, 152.
- [3] H. Lai, J. X. Li, Z. G. Chen, Z. G. Huang, *ACS Appl. Mater. Interfaces*, **2012**, *4*, 2325.
- [4] J. G. Wang, C. B. Zhang, F. Y. Kang, *ACS Appl. Mater. Interfaces.* **2015**, *7*, 9185.
- [5] W. Xiao, J. S. Chen, Q. Lu, X. W. Lou, *J. Phys. Chem. C.* **2010**, *114*, 12048.
- [6] Z. Y. Cai, L. Xu, M. Y. Yan, C. H. Han, L. He, K. M. Hercule, C. J. Niu, Z. F. Yuan, W. W. Xu, L. B. Qu, K. N. Zhao, L. Q. Mai, *Nano Lett.* **2015**, *15*, 738.
- [7] Y. M. Sun, X. L. Hu, W. Luo, F. F. Xia, Y. H. Huang, *Adv. Funct. Mater.* **2013**, *23*, 2436.
